# Supplementary material for: Nitrate formation from heterogeneous uptake of dinitrogen pentoxide during a severe winter haze in southern China
Source: Copernicus journal article supplement (doi:10.5194/acp-18-17515-2018), 2018-12-11
Supplement: Supplementary file 1 [file acp-18-17515-2018-supplement.pdf]

Supplement of Atmos. Chem. Phys., 18, 17515–17527, 2018  
<https://doi.org/10.5194/acp-18-17515-2018-supplement>  
© Author(s) 2018. This work is distributed under  
the Creative Commons Attribution 4.0 License.

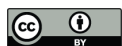

*Supplement of*

## **Nitrate formation from heterogeneous uptake of dinitrogen pentoxide during a severe winter haze in southern China**

**Hui Yun et al.**

*Correspondence to:* Tao Wang (cetwang@polyu.edu.hk)

The copyright of individual parts of the supplement might differ from the CC BY 4.0 License.

### Text S1. Sensitivity tests for OBM model

The uncertainties of the measured input of NMHC, OVOCs and HONO could lead to the uncertainties of the simulated concentrations of the daytime OH radicals and also the calculated rates of OH+NO<sub>2</sub> reaction. We carried out sensitivity tests by reducing the input concentrations by 10% to check the deviation of the average daytime (7:00-17:00) rate of OH+NO<sub>2</sub> reaction. The method of Relative Increment Reactivity (RIR) was applied here as the indicator of the sensitivity (see the following equation). R<sub>1</sub> means the original rate of OH+NO<sub>2</sub> reaction, while R<sub>0.9</sub> means the rate of OH+NO<sub>2</sub> reaction after the input concentrations were reduced to 90%.

$$RIR = \frac{(R_1 - R_{0.9}) / R_1}{10\%}$$

NMHCs were categorized into four groups, including C4HC, LRHC, AROM and OLF, which represent alkanes with ≥4 carbons, hydrocarbons with low reactivity (including ethane, propane and benzene), reactive aromatics (including all aromatics except for benzene), and reactive olefins (including all alkenes), respectively (Xue et al., 2014). As shown in the below figure, the simulated rate of OH+NO<sub>2</sub> reaction was most sensitive to HONO (RIR of 0.6-0.8), followed by NO<sub>x</sub> (RIR of 0.2-0.5) and OVOCs (RIR of 0-0.2).

- Tan, Z., Fuchs, H., Lu, K., Hofzumahaus, A., Bohn, B., Broch, S., Dong, H., Gomm, S., Häsel, R., He, L., Holland, F., Li, X., Liu, Y., Lu, S., Rohrer, F., Shao, M., Wang, B., Wang, M., Wu, Y., Zeng, L., Zhang, Y., Wahner, A., and Zhang, Y.: Radical chemistry at a rural site (Wangdu) in the North China Plain: observation and model calculations of OH, HO<sub>2</sub> and RO<sub>2</sub> radicals, *Atmos. Chem. Phys.*, 17, 663-690, 10.5194/acp-17-663-2017, 2017.
- Tham, Y. J., Wang, Z., Li, Q., Yun, H., Wang, W., Wang, X., Xue, L., Lu, K., Ma, N., Bohn, B., Li, X., Kecorius, S., Größ, J., Shao, M., Wiedensohler, A., Zhang, Y., and Wang, T.: Significant concentrations of nitryl chloride sustained in the morning: investigations of the causes and impacts on ozone production in a polluted region of northern China, *Atmos. Chem. Phys.*, 16, 14959-14977, 10.5194/acp-16-14959-2016, 2016.
- Xue, L., Wang, T., Louie, P. K. K., Luk, C. W. Y., Blake, D. R., and Xu, Z.: Increasing external effects negate local efforts to control ozone air pollution: A case study of Hong Kong and implications for other Chinese cities, *Environmental Science and Technology*, 48, 10769-10775, 10.1021/es503278g, 2014.

Table S1. Average concentrations (ppbv) of NMHCs species during the daytime (7:00-17:00 LT) and nighttime (17:00-7:00 LT of the next day) from Jan 3 to Jan 7.

| Species         | Daytime | Nighttime | Species                | Daytime | Nighttime |
|-----------------|---------|-----------|------------------------|---------|-----------|
| Ethane          | 2.257   | 2.310     | Isoprene               | 0.092   | 0.026     |
| Propane         | 7.032   | 6.239     | Cis-2-Pentene          | 0.006   | 0.005     |
| i-Butane        | 2.561   | 2.324     | 1-Hexene               | 0.032   | 0.023     |
| n-Butane        | 4.879   | 4.588     | 1,3-Butadiene          | 0.041   | 0.067     |
| i-Pentane       | 2.105   | 3.435     | Benzene                | 0.767   | 0.832     |
| n-Pentane       | 1.666   | 4.128     | Toluene                | 5.447   | 6.076     |
| 2-Methylpentane | 0.980   | 0.868     | Ethylbenzene           | 1.313   | 1.812     |
| n-Hexane        | 0.762   | 0.706     | m-xylene               | 1.143   | 1.936     |
| n-Heptane       | 0.307   | 0.273     | p-xylene               | 1.143   | 1.936     |
| n-Octane        | 0.085   | 0.068     | o-xylene               | 0.988   | 1.644     |
| Ethene          | 2.487   | 2.684     | 1,3,5-trimethylbenzene | 0.025   | 0.029     |
| Propene         | 0.352   | 0.393     | 1,2,4-trimethylbenzene | 0.022   | 0.045     |
| Ethyne          | 2.162   | 2.054     | 1,2,3-trimethylbenzene | 0.029   | 0.029     |
| trans-2-Butene  | 0.021   | 0.021     | i-propbenzene          | 0.027   | 0.034     |
| 1-Butene        | 0.063   | 0.072     | propbenzene            | 0.038   | 0.034     |
| cis-2-Butene    | 0.024   | 0.027     | m-ethyltoluene         | 0.076   | 0.068     |
| 1-Pentene       | 0.011   | 0.011     | p-ethyltoluene         | 0.049   | 0.042     |
| trans-2-Pentene | 0.006   | 0.005     | o-ethyltoluene         | 0.041   | 0.037     |

Table S2. Average values ( $\mu\text{g m}^{-3}$ ) of  $\text{PM}_{2.5}$  loadings and the composition of  $\text{PM}_{2.5}$  during the time periods corresponding to Table 2 in the manuscript.

| Date              | Cl <sup>-</sup> | NO <sub>3</sub> <sup>-</sup> | SO <sub>4</sub> <sup>2-</sup> | NH <sub>4</sub> <sup>+</sup> | OM   | EC   | PM <sub>2.5</sub> |
|-------------------|-----------------|------------------------------|-------------------------------|------------------------------|------|------|-------------------|
| Jan.3 17:40-19:00 | 0.9             | 19.7                         | 8.8                           | 6.5                          | 37.4 | 8.0  | 86.4              |
| Jan 4 17:00-22:00 | 1.5             | 44.3                         | 8.7                           | 12.0                         | 44.6 | 13.2 | 150.7             |
| Jan 5 17:00-22:00 | 1.6             | 68.9                         | 15.5                          | 15.3                         | 56.6 | 14.2 | 216.6             |
| Jan 6 17:00-22:40 | 2.7             | 40.0                         | 15.7                          | 13.8                         | 54.6 | 10.5 | 174.3             |
| Jan 9 19:00-00:20 | 0.8             | 29.9                         | 7.2                           | 8.9                          | 36.7 | 11.6 | 117.3             |

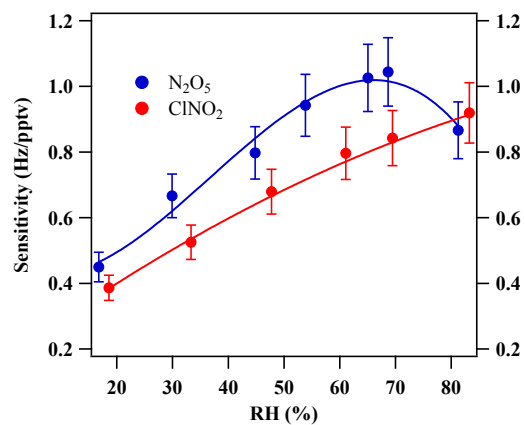

Figure S1. The sensitivity of CIMS as a function of RH for N<sub>2</sub>O<sub>5</sub> at 235 m/z and ClONO<sub>2</sub> at 208 m/z at Heshan site.

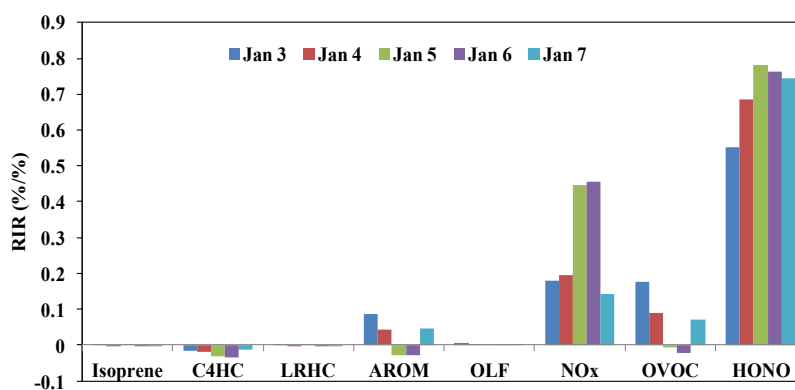

Figure S2. OBM-calculated RIRs to check the sensitivity of the average daytime (7:00-17:00) rate of OH+NO<sub>2</sub> reaction to 10% reduction of the measurement input data.

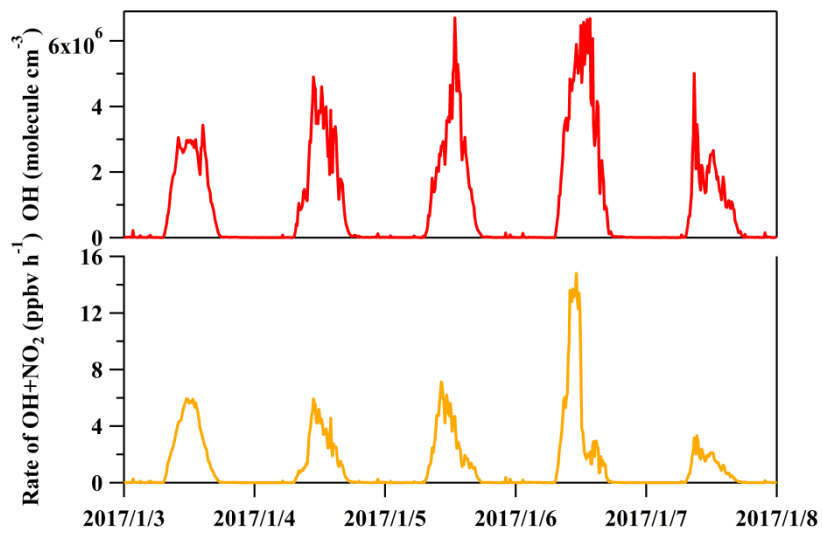

Figure S3. Variation of OH mixing ratio and the rate of OH+NO<sub>2</sub> from Jan 3 to Jan 7.
